# Supplementary material for: A Sensitive and Label-Free Pb(II) Fluorescence Sensor Based on a DNAzyme Controlled G-Quadruplex/Thioflavin T Conformation
Source: PubMed Central journal article supplement (PMC5191135; doi:10.3390/s16122155), 2016-12-16
Supplement: sensors-16-02155-s001.pdf [file sensors-16-02155-s001.pdf]

# Supplementary Materials: Sensitive and Label-Free Pb(II) Fluorescent Sensor Based on DNzyme Controlled G-Quadruplex/Thioflavin T Conformation

Yanli Wen, Lele Wang, Lanying Li, Li Xu and Gang Liu

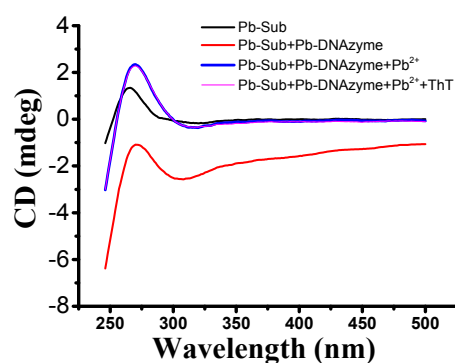

Figure S1. CD spectrum of different samples.

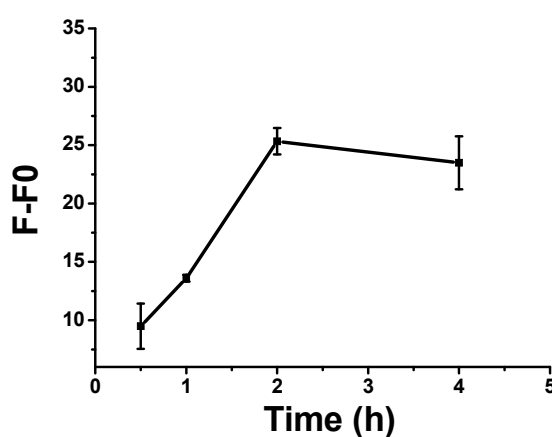

Figure S2. A time-dependent amplification of the fluorescence sensor for 50 nM Pb<sup>2+</sup> detection.

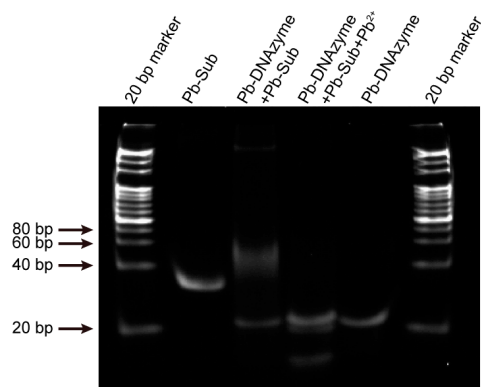

Figure S3. Polyacrylamide gel electrophoresis results of different samples.

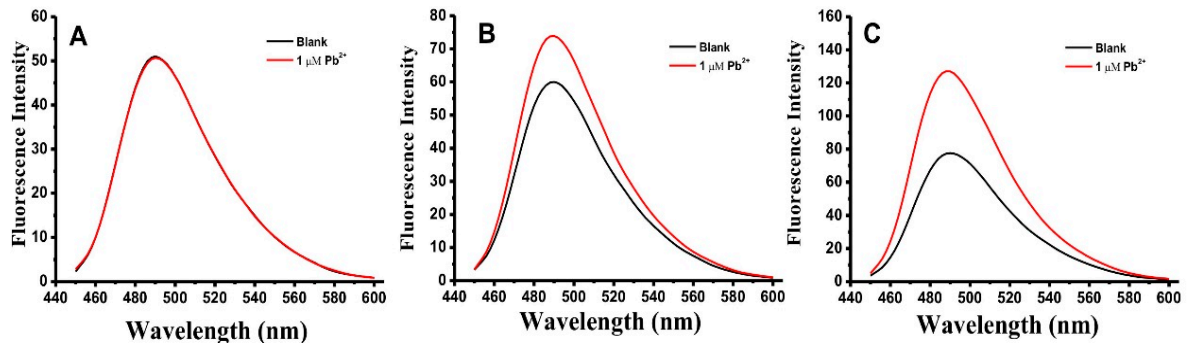

**Figure S4.** Original data for the optimization result of the analysis temperature (A) 4 °C; (B) 25 °C; (C) 37 °C in the presence of 1 μM Pb<sup>2+</sup>.

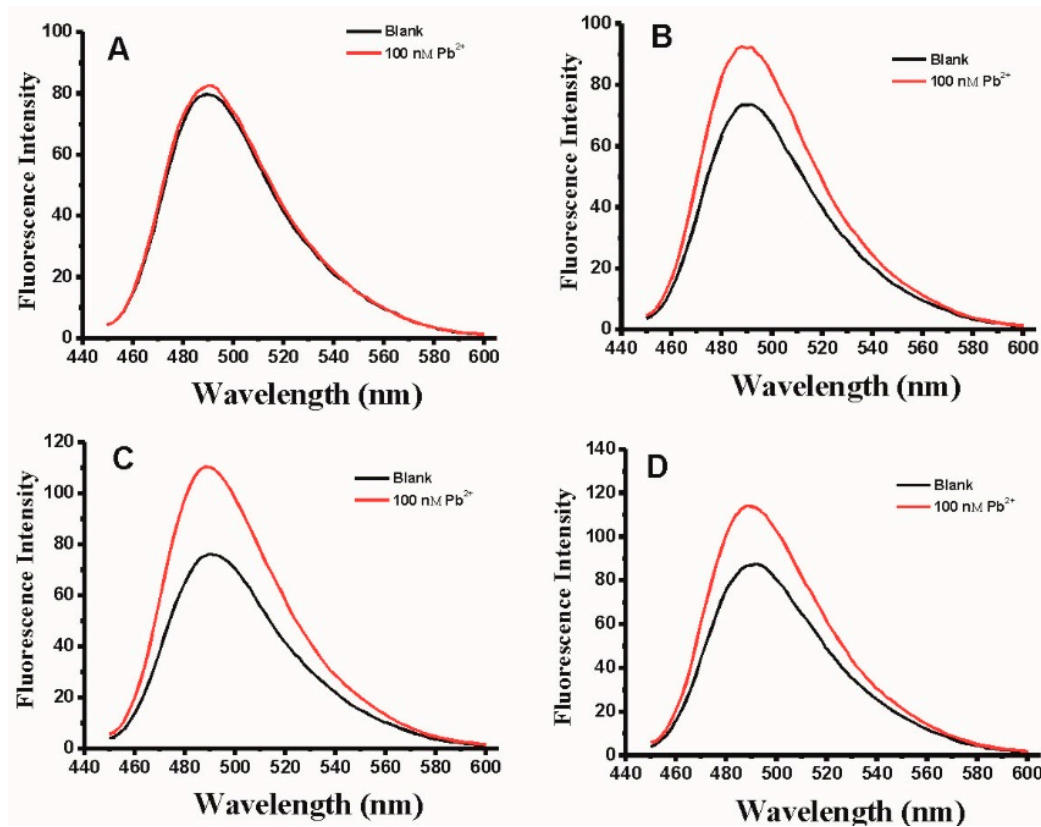

**Figure S5.** Original data of 100 nM Pb<sup>2+</sup> sensing in the presence of different concentration of Pb-DNAzyme: (A) 0.1 μM; (B) 0.2 μM; (C) 0.3 μM; (D) 0.5 μM.

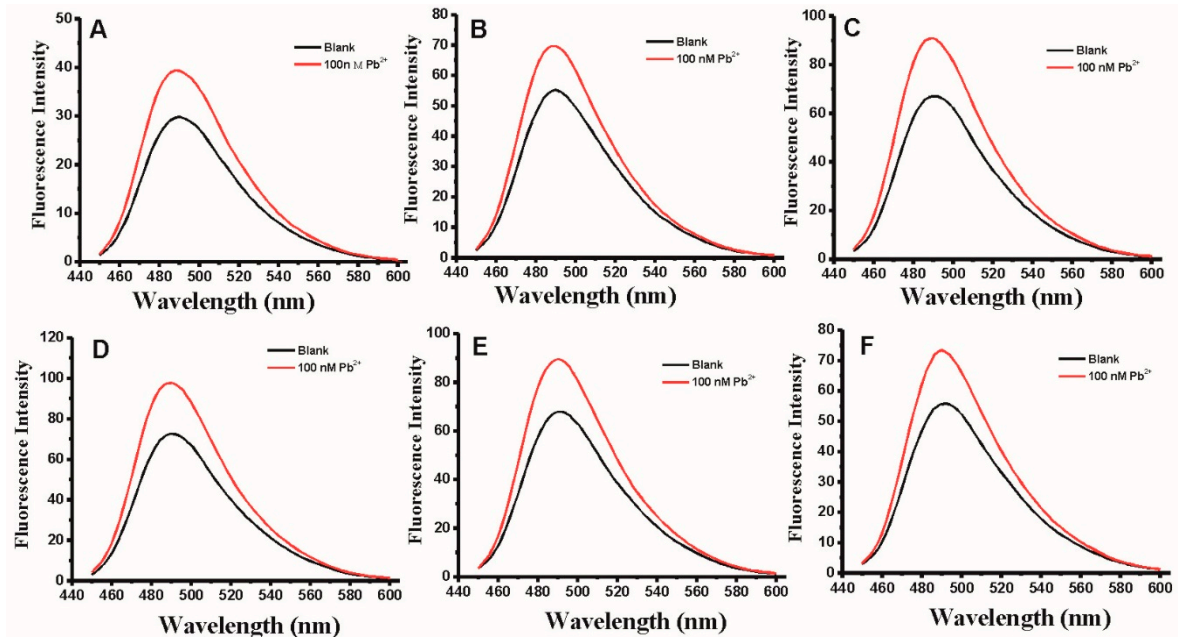

**Figure S6.** Original data of 100 nM  $Pb^{2+}$  sensing using different concentration of ThT: (A) 2  $\mu M$ ; (B) 5  $\mu M$ ; (C) 10  $\mu M$ ; (D) 20  $\mu M$ ; (E) 30  $\mu M$ ; (F) 50  $\mu M$ .
